# Supplementary material for: Heparin-binding growth factor (HDGF) drives radioresistance in breast cancer by activating the STAT3 signaling pathway
Source: Springer Nature journal article supplement (doi:10.1186/s12967-021-03021-y), 2021-08-10
Supplement: MOESM1 [file 19559440]

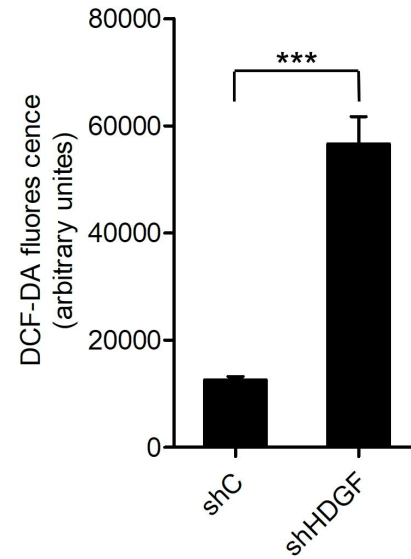

**Supplementary Figure 1** Intracellular ROS production was measured using the peroxide-sensitive fluorescent probe 2',7'-dichlorodihydrofluorescein diacetate (DCF-DA). HDGF knockdown significantly increased ROS formation compared to control group. The data were quantitated, and the results are expressed as the means  $\pm$  SE.
